# Supplementary material
Source: Springer Nature journal article supplement (https://www.springermedizin.de/resource/supplementary/12958_2009_598_MOESM1_ESM.pdf/9568064)

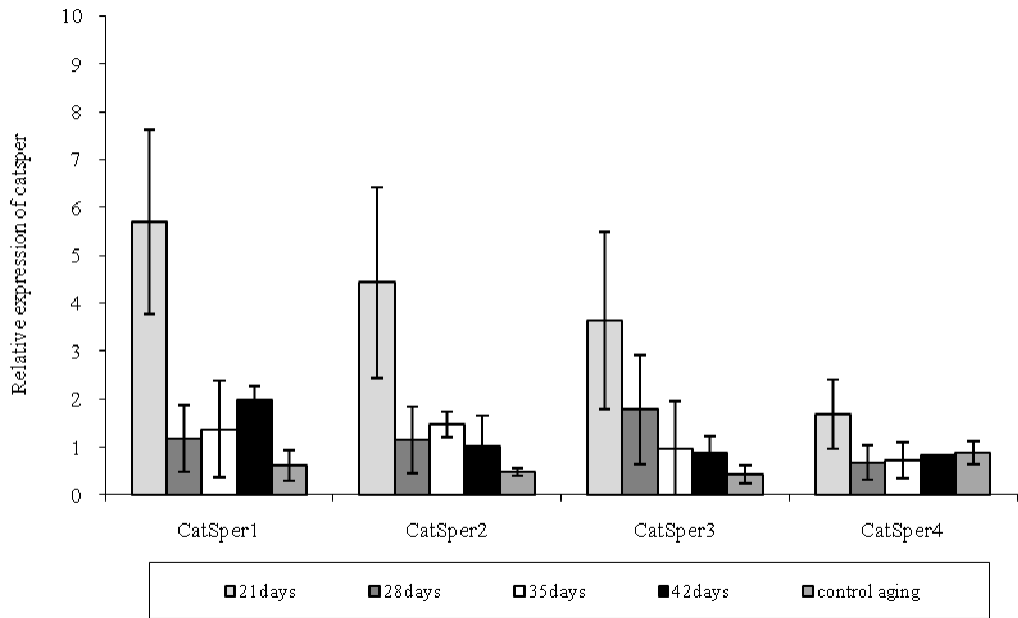

Supplement: MOESM1 [file 9568064]
